# Supplementary material for: Beyond the Kidney: Extra-Renal Manifestations of Monogenic Nephrolithiasis and Their Significance
Source: bioRxiv or medRxiv preprint supplement (doi:10.1101/2023.05.16.23289588), 2023-05-18
Supplement: Supplementary file [file media-2.pdf]

| Gene-Associated Phenotype (n=55) | Phenotype Category (n=24) |             |                |           |            |        |        |          |          |        |         |          |         |         |                           |          |          |          |            |            |                    |                         |        |           | Number of phenotype categories involved per GAP (%) |          |
|----------------------------------|---------------------------|-------------|----------------|-----------|------------|--------|--------|----------|----------|--------|---------|----------|---------|---------|---------------------------|----------|----------|----------|------------|------------|--------------------|-------------------------|--------|-----------|-----------------------------------------------------|----------|
|                                  | Growth                    | Respiratory | Cardiovascular | Endocrine | Neurologic | Nose   | Mouth  | Teeth    | Eyes     | Neck   | Face    | Ears     | Head    | Chest   | Abdomen/ Gastrointestinal | Muscle   | Skin     | Skeletal | Hematology | Immunology | Metabolic Features | Prenatal Manifestations | Voice  | Neoplasia |                                                     |          |
| ADCY10                           | N                         | N           | N              | N         | N          | N      | N      | N        | N        | N      | N       | N        | N       | N       | N                         | N        | N        | N        | N          | N          | N                  | N                       | N      | N         | 1 (4%)                                              |          |
| AGXT                             | N                         | N           | Y              | N         | Y          | N      | N      | Y        | Y        | N      | N       | N        | N       | N       | N                         | N        | Y        | Y        | N          | N          | Y                  | N                       | N      | N         | 8 (33%)                                             |          |
| ALDOB                            | Y                         | N           | N              | N         | Y          | N      | N      | Y        | N        | N      | N       | N        | N       | N       | Y                         | N        | Y        | N        | N          | N          | Y                  | N                       | N      | N         | 7 (29%)                                             |          |
| ALPL                             | Y                         | Y           | N              | N         | Y          | N      | N      | Y        | Y        | N      | Y       | N        | Y       | Y       | Y                         | N        | Y        | Y        | Y          | N          | N                  | Y                       | Y      | N         | 14 (58%)                                            |          |
| APRT                             | N                         | N           | N              | N         | N          | N      | N      | N        | N        | N      | N       | N        | N       | N       | N                         | N        | N        | N        | N          | N          | N                  | N                       | N      | N         | 1 (4%)                                              |          |
| ATP6V0A4                         | N                         | N           | N              | N         | N          | N      | N      | N        | N        | N      | Y       | N        | N       | N       | N                         | N        | N        | Y        | N          | N          | Y                  | N                       | N      | N         | 4 (17%)                                             |          |
| ATP6V1B1                         | Y                         | N           | N              | N         | N          | N      | N      | N        | N        | N      | N       | Y        | N       | N       | Y                         | N        | N        | Y        | N          | N          | Y                  | N                       | N      | N         | 6 (25%)                                             |          |
| ATP7B                            | N                         | N           | N              | Y         | Y          | N      | N      | N        | Y        | N      | N       | N        | N       | N       | Y                         | N        | N        | Y        | Y          | N          | N                  | N                       | N      | N         | 7 (29%)                                             |          |
| BSND                             | N                         | N           | N              | N         | N          | N      | N      | N        | N        | N      | N       | N        | N       | N       | N                         | N        | N        | N        | N          | N          | N                  | N                       | N      | N         | 1 (4%)                                              |          |
| CAZ                              | Y                         | N           | N              | N         | Y          | N      | N      | Y        | N        | N      | N       | Y        | N       | N       | N                         | Y        | N        | Y        | Y          | N          | Y                  | N                       | N      | N         | 8 (33%)                                             |          |
| CASR                             | Y                         | Y           | N              | Y         | Y          | N      | N      | N        | N        | N      | N       | N        | N       | Y       | Y                         | Y        | N        | Y        | Y          | N          | N                  | N                       | N      | N         | 10 (42%)                                            |          |
| CLCN5                            | Y                         | N           | N              | N         | N          | N      | N      | N        | N        | N      | N       | N        | N       | N       | N                         | N        | N        | Y        | N          | N          | N                  | N                       | N      | N         | 3 (13%)                                             |          |
| CLCNKA                           | Y                         | N           | N              | Y         | Y          | N      | N      | N        | N        | N      | N       | Y        | N       | N       | N                         | Y        | N        | N        | N          | N          | N                  | Y                       | N      | N         | 7 (29%)                                             |          |
| CLCNKB                           | Y                         | N           | Y              | Y         | Y          | N      | N      | N        | Y        | N      | N       | Y        | N       | N       | N                         | Y        | N        | N        | N          | N          | Y                  | Y                       | N      | N         | 10 (42%)                                            |          |
| CLDN16                           | Y                         | N           | N              | N         | Y          | N      | N      | N        | Y        | N      | N       | N        | N       | N       | Y                         | Y        | N        | N        | N          | N          | Y                  | N                       | N      | N         | 7 (29%)                                             |          |
| CLDN19                           | N                         | N           | N              | N         | N          | N      | N      | Y        | Y        | N      | N       | N        | N       | N       | N                         | N        | N        | N        | N          | N          | N                  | N                       | N      | N         | 3 (13%)                                             |          |
| CTNS                             | Y                         | N           | N              | Y         | Y          | N      | N      | N        | Y        | N      | Y       | N        | N       | Y       | Y                         | Y        | Y        | Y        | N          | N          | Y                  | N                       | Y      | N         | 13 (54%)                                            |          |
| CYP24A1                          | Y                         | N           | N              | N         | Y          | N      | N      | N        | N        | N      | N       | N        | N       | N       | Y                         | Y        | N        | N        | N          | N          | Y                  | N                       | N      | N         | 6 (25%)                                             |          |
| FAH                              | Y                         | N           | Y              | N         | Y          | N      | N      | N        | N        | N      | N       | N        | N       | N       | Y                         | Y        | N        | Y        | Y          | N          | Y                  | N                       | N      | Y         | 10 (42%)                                            |          |
| FAM20A                           | N                         | N           | N              | N         | N          | N      | N      | Y        | N        | N      | N       | N        | N       | N       | N                         | N        | N        | N        | N          | N          | Y                  | N                       | N      | N         | 3 (13%)                                             |          |
| FOX11                            | N                         | N           | N              | N         | N          | N      | N      | N        | N        | N      | N       | Y        | N       | N       | N                         | N        | N        | N        | N          | N          | N                  | N                       | N      | N         | 1 (4%)                                              |          |
| G6PC                             | Y                         | N           | Y              | N         | N          | N      | N      | N        | Y        | N      | Y       | N        | N       | N       | Y                         | Y        | Y        | Y        | Y          | N          | Y                  | N                       | N      | N         | 11 (46%)                                            |          |
| GNA11                            | Y                         | N           | N              | Y         | Y          | N      | N      | N        | N        | N      | N       | N        | N       | N       | N                         | Y        | N        | N        | N          | N          | N                  | N                       | N      | N         | 4 (17%)                                             |          |
| GFPH                             | N                         | N           | N              | N         | Y          | N      | N      | N        | Y        | N      | N       | N        | N       | N       | Y                         | Y        | N        | N        | N          | N          | N                  | N                       | N      | N         | 4 (17%)                                             |          |
| GRHR                             | N                         | N           | N              | N         | N          | N      | N      | N        | N        | N      | N       | N        | N       | N       | N                         | N        | N        | N        | N          | N          | N                  | N                       | N      | N         | 1 (4%)                                              |          |
| HNFA4                            | Y                         | N           | N              | Y         | N          | N      | N      | N        | N        | N      | N       | N        | N       | N       | Y                         | N        | N        | Y        | N          | N          | N                  | N                       | N      | N         | 5 (21%)                                             |          |
| HOGA1                            | N                         | N           | N              | N         | N          | N      | N      | N        | N        | N      | N       | N        | N       | N       | N                         | N        | N        | N        | N          | N          | N                  | N                       | N      | N         | 1 (4%)                                              |          |
| HPRT1                            | Y                         | N           | N              | N         | Y          | N      | N      | N        | N        | N      | N       | N        | N       | N       | Y                         | N        | Y        | Y        | Y          | N          | N                  | N                       | N      | N         | 7 (29%)                                             |          |
| KCNJ1                            | Y                         | N           | Y              | Y         | Y          | N      | N      | N        | Y        | N      | Y       | Y        | Y       | N       | Y                         | Y        | N        | Y        | Y          | N          | N                  | Y                       | N      | N         | 14 (58%)                                            |          |
| KCNJ10                           | Y                         | N           | Y              | Y         | Y          | N      | N      | N        | N        | N      | N       | Y        | N       | N       | Y                         | N        | N        | N        | N          | N          | Y                  | N                       | N      | N         | 7 (29%)                                             |          |
| KL                               | N                         | N           | Y              | Y         | Y          | N      | N      | Y        | N        | N      | N       | N        | N       | N       | N                         | N        | N        | Y        | N          | N          | N                  | N                       | N      | N         | 5 (21%)                                             |          |
| LRP2                             | Y                         | Y           | Y              | N         | Y          | Y      | N      | N        | Y        | N      | Y       | Y        | Y       | Y       | Y                         | N        | Y        | Y        | Y          | N          | N                  | N                       | N      | N         | 14 (58%)                                            |          |
| MAGED2                           | N                         | N           | N              | N         | N          | N      | N      | N        | N        | N      | N       | N        | N       | N       | N                         | N        | N        | N        | N          | N          | N                  | Y                       | N      | N         | 2 (8%)                                              |          |
| MGP                              | Y                         | Y           | Y              | N         | Y          | N      | N      | N        | N        | N      | Y       | Y        | N       | Y       | N                         | N        | Y        | Y        | N          | N          | N                  | N                       | Y      | Y         | N                                                   | 12 (50%) |
| MOCOS                            | N                         | N           | N              | N         | N          | N      | N      | N        | N        | N      | N       | N        | N       | N       | Y                         | Y        | N        | N        | N          | N          | N                  | N                       | N      | N         | 1 (4%)                                              |          |
| MOCOS1                           | Y                         | N           | N              | N         | Y          | Y      | N      | Y        | N        | Y      | N       | Y        | N       | Y       | Y                         | N        | Y        | N        | N          | N          | N                  | N                       | N      | N         | 10 (42%)                                            |          |
| MOCOS2                           | Y                         | N           | N              | N         | Y          | Y      | Y      | N        | Y        | N      | Y       | N        | Y       | N       | Y                         | Y        | N        | Y        | N          | N          | N                  | N                       | N      | N         | 10 (42%)                                            |          |
| OCRL                             | Y                         | N           | N              | N         | Y          | N      | N      | Y        | Y        | N      | N       | N        | N       | N       | Y                         | N        | Y        | Y        | Y          | N          | Y                  | Y                       | N      | N         | 10 (42%)                                            |          |
| ORA11                            | Y                         | Y           | N              | N         | Y          | N      | Y      | Y        | Y        | Y      | N       | N        | N       | N       | N                         | Y        | Y        | Y        | Y          | N          | Y                  | Y                       | N      | N         | 12 (50%)                                            |          |
| PRPS1                            | N                         | N           | N              | N         | Y          | N      | N      | N        | N        | N      | N       | Y        | N       | N       | N                         | N        | N        | Y        | N          | N          | Y                  | N                       | N      | N         | 5 (21%)                                             |          |
| SLC12A1                          | Y                         | N           | Y              | Y         | Y          | N      | N      | N        | N        | N      | N       | N        | N       | N       | Y                         | Y        | N        | Y        | N          | N          | Y                  | Y                       | N      | N         | 10 (42%)                                            |          |
| SLC22A12                         | N                         | N           | N              | N         | N          | N      | N      | N        | N        | N      | N       | N        | N       | N       | N                         | N        | N        | N        | N          | N          | N                  | N                       | N      | N         | 1 (4%)                                              |          |
| SLC26A1                          | N                         | N           | N              | N         | N          | N      | N      | N        | N        | N      | N       | N        | N       | N       | N                         | N        | N        | N        | N          | N          | N                  | N                       | N      | N         | 1 (4%)                                              |          |
| SLC2A2                           | Y                         | N           | N              | N         | Y          | N      | N      | N        | N        | N      | N       | N        | N       | N       | Y                         | Y        | N        | Y        | N          | N          | Y                  | N                       | N      | N         | 7 (29%)                                             |          |
| SLC2A9                           | N                         | N           | N              | N         | N          | N      | N      | N        | N        | N      | N       | N        | N       | N       | N                         | N        | N        | N        | N          | N          | N                  | N                       | N      | N         | 1 (4%)                                              |          |
| SLC34A1                          | Y                         | N           | N              | Y         | N          | N      | N      | N        | N        | N      | N       | N        | N       | N       | N                         | Y        | N        | Y        | N          | N          | N                  | N                       | N      | N         | 5 (21%)                                             |          |
| SLC34A3                          | Y                         | N           | N              | N         | N          | N      | N      | N        | N        | N      | N       | N        | Y       | Y       | Y                         | Y        | N        | Y        | N          | N          | N                  | N                       | N      | N         | 7 (29%)                                             |          |
| SLC3A1                           | N                         | N           | N              | N         | N          | N      | N      | N        | N        | N      | N       | N        | N       | N       | N                         | N        | N        | N        | N          | N          | N                  | N                       | N      | N         | 1 (4%)                                              |          |
| SLC4A1                           | Y                         | N           | N              | N         | Y          | N      | N      | N        | N        | N      | N       | N        | N       | N       | Y                         | N        | Y        | Y        | Y          | N          | Y                  | N                       | N      | N         | 8 (33%)                                             |          |
| SLC5A1                           | Y                         | N           | N              | N         | N          | N      | N      | N        | N        | N      | N       | N        | N       | N       | Y                         | N        | N        | N        | N          | N          | Y                  | N                       | N      | N         | 3 (13%)                                             |          |
| SLC7A9                           | N                         | N           | N              | N         | N          | N      | N      | N        | N        | N      | N       | N        | N       | N       | N                         | N        | N        | N        | N          | N          | N                  | N                       | N      | N         | 1 (4%)                                              |          |
| SLC9A3R1                         | N                         | N           | N              | N         | N          | N      | N      | N        | N        | N      | N       | N        | N       | N       | N                         | N        | N        | Y        | N          | N          | N                  | N                       | N      | N         | 2 (8%)                                              |          |
| VDR                              | Y                         | N           | N              | Y         | Y          | N      | N      | Y        | N        | N      | N       | Y        | Y       | Y       | Y                         | Y        | Y        | Y        | Y          | N          | N                  | N                       | N      | N         | 11 (46%)                                            |          |
| WDR72                            | N                         | N           | N              | N         | N          | N      | N      | Y        | N        | N      | N       | N        | N       | N       | N                         | N        | N        | N        | N          | N          | N                  | N                       | N      | N         | 1 (4%)                                              |          |
| XDH                              | N                         | N           | N              | N         | N          | N      | N      | N        | N        | N      | N       | N        | N       | N       | N                         | Y        | N        | N        | N          | N          | N                  | N                       | N      | N         | 2 (8%)                                              |          |
| Number of GAPs (%)               | 31 (56%)                  | 5 (9%)      | 10 (18%)       | 12 (22%)  | 29 (53%)   | 4 (7%) | 3 (5%) | 11 (20%) | 15 (27%) | 1 (2%) | 8 (15%) | 12 (22%) | 7 (13%) | 7 (13%) | 25 (45%)                  | 22 (40%) | 12 (22%) | 29 (53%) | 9 (16%)    | 1 (2%)     | 20 (36%)           | 8 (15%)                 | 3 (5%) | 1 (2%)    |                                                     |          |
| P-value                          | <0.001                    | 0.16        | 0.99           | 0.63      | <0.001     | 0.08   | 0.04   | 0.80     | 0.26     | <0.001 | 0.60    | 0.60     | 0.43    | 0.43    | <0.001                    | 0.01     | 0.60     | <0.001   | 0.80       | <0.001     | 0.03               | 0.60                    | 0.03   | <0.001    |                                                     |          |

Supplementary Table 2.

A detailed breakdown of each gene's impact on every phenotype category, including the number of categories affected by each gene and the number of genes that impact each category. Additionally, the results of the chi-square test for each category are included.

Y: Yes; involved

N: No; not involved

GAP: gene-associated phenotype
